1 **Bi-level positive airway pressure (biPAP) for non-invasive**  
2 **respiratory support of foals**

3

4 Sharanne L Raidal<sup>1\*</sup>, Lexi Burgmeestre<sup>1</sup>, Chee Sum Melanie Catanchin<sup>1</sup>, Chris T Quinn<sup>1</sup>

5

6 <sup>1</sup> School of Animal and Veterinary Sciences, Charles Sturt University, Wagga Wagga, NSW, Australia

7

8 \* corresponding author

9 E-mail: [sraidal@csu.edu.au](mailto:sraidal@csu.edu.au)

## 10 **Abstract**

11 Respiratory insufficiency and pulmonary health are important considerations in equine neonatal care,  
12 as the majority of foals are bred for athletic function. The administration of supplementary oxygen is  
13 readily implemented in equine practice settings, but this does not address respiratory insufficiency  
14 due to inadequate ventilation and is no longer considered optimal care for hypoxia in some settings.  
15 Non-invasive ventilatory strategies including continuous or bi-level positive airway pressure are  
16 effective in human and veterinary studies, and may offer improved respiratory support in equine  
17 clinical practice. The current study was conducted in two parts to investigate the use of a commercial  
18 bilevel positive airway pressure (biPAP) ventilator, designed for home care of people with obstructive  
19 respiratory conditions, for respiratory support of foals. In Part 1 a prospective observational study was  
20 conducted to evaluate the effect of sequential application of supplementary oxygen and then biPAP  
21 for respiratory support of five foals  $\leq 4$  days of age hospitalised with respiratory insufficiency (Group  
22 1) and four healthy, sedated foals  $< 28$  days of age (Group 2). In Part 2, biPAP and supplementary  
23 oxygen were administered to six healthy foals with pharmacologically induced respiratory  
24 insufficiency in a two sequence, two phase, cross-over study (Group 3). Non-invasive ventilation by  
25 biPAP improved gas exchange and mechanics of breathing (increased tidal volume, decreased  
26 respiratory rate and increased peak inspiratory flow) in foals, but modest hypercapnia was observed  
27 in healthy, sedated foals (Groups 2 and 3). Clinical cases (Group 1) appeared less likely to develop  
28 hypercapnia in response to treatment, however the response in individual foals was variable, and  
29 close monitoring is necessary. Clinical observations, pulse oximetry and CO<sub>2</sub> monitoring of expired  
30 gases were of limited benefit in identification of foals responding inappropriately to biPAP, and  
31 improved methods to assess and monitor respiratory function are required in foals.

32

## 33 **Introduction**

34 Respiratory disease has long been recognised as of considerable economic importance in newborn  
35 foals (1), and as an important cause of morbidity and death in neonates presented for veterinary care

36 (2, 3). Optimal respiratory support is highly desirable to optimise survival and preserve respiratory  
37 function in animals bred largely for their athletic potential.

38

39 The use of non-invasive ventilation (NIV) is now widely regarded as the most effective approach for  
40 respiratory support of human neonates (4, 5), with continuous positive airway pressure (CPAP) shown  
41 to reduce the number of preterm infants requiring admission to neonatal intensive care (6), and to  
42 decrease the risk of bronchopulmonary dysplasia or death in neonates requiring respiratory support  
43 (7). The technique involves the delivery of a constant positive (greater than atmospheric) pressure to  
44 the airway and preserves spontaneous respiration. The physiological effects are complex and likely to  
45 vary depending on the underlying pathology (8), but benefits have been attributed to increased  
46 functional residual capacity, decreased work of breathing and reduced airway resistance (4). Previous  
47 studies have demonstrated that CPAP is associated with improved respiratory function in a number of  
48 veterinary species (9-12). CPAP has recently been shown to improve gas exchange in healthy foals  
49 with pharmacologically induced respiratory suppression (13), however hypercapnia was observed in  
50 treated foals in this study, and has been observed previously in anaesthetised horses during CPAP (10,  
51 11, 14).

52

53 Bi-level positive airway pressure (biPAP) is also recognised for the management of respiratory  
54 insufficiency in human neonates, and has recently demonstrated improved treatment outcomes in  
55 preterm human neonates in comparison to CPAP (15, 16). By using lower expiratory pressures, biPAP  
56 promises improved expiratory function and is recommended for management of conditions  
57 associated with hypercapnia, such as chronic obstructive airway disease or asthma (17-19). In human  
58 patients with obstructive airway conditions, expiratory airflow limitations may cause increased PaCO<sub>2</sub>  
59 due to overdistension of alveoli and consequent increased alveolar dead space (20-23), an effect  
60 which has been termed dynamic hyperinflation (24).

61

62 Whereas human neonates exhale passively (25), both inspiration and expiration are active processes,  
63 requiring muscular effort in foals (26). Equids might therefore be predisposed to expiratory flow  
64 limitations and retention of CO<sub>2</sub> if active breathing strategies are unable to overcome expiratory  
65 pressures during CPAP.

66

67 We hypothesised that CPAP might be associated with diffuse expiratory flow limitation, increased  
68 intrinsic positive end-expiratory pressure (PEEP<sub>i</sub>) and alveolar overdistension in foals, and this would  
69 then predispose to hypercapnia. Lower expiratory pressures during biPAP might then be expected to  
70 facilitate expiration and ameliorate this effect. The current study was undertaken to determine  
71 whether a commercially available bi-level respiratory device available for the home care of people  
72 with respiratory disease might offer improved ventilatory support in healthy foals with  
73 pharmacologically induced respiratory disease, and to characterise the response of hospitalised  
74 neonatal foals with respiratory insufficiency managed with biPAP. We hypothesised that biPAP would  
75 be associated with benefits in improved gas exchange previously observed during CPAP (Raidal et al),  
76 but with less CO<sub>2</sub> retention. Intentionally, the study was designed to evaluate low cost intervention  
77 and monitoring strategies that might be safely implemented in equine practice or on farm.

78

## 79 **Materials and Methods**

### 80 *Animals*

81 The study was conducted in two parts: an observational study of foals < 4 weeks of age (Groups 1 and  
82 2), and an interventional study (Group 3). The study protocol was approved by the Charles Sturt  
83 University Animal Care and Ethics Committee (ACEC A18044).

84

85 Group 1 consisted of five foals (Table 1) presented to the equine neonatal intensive care unit (NICU)  
86 at the Veterinary Clinical Centre, Charles Sturt University, with respiratory insufficiency defined as  
87 hypoxia (PaO<sub>2</sub> <85 mmHg) and/or hypercapnia (PaCO<sub>2</sub> > 50 mmHg). Four had clinical signs consistent

88 with neonatal multisystemic maladjustment syndrome (NMMS) including recumbency (F1, F3, F4),  
89 altered mentation (F1, F3, F4, F5), and failure to nurse (F1, F3, F4, F5). One university owned foal (F2)  
90 was presented with respiratory insufficiency and polysynovitis (all four fetlock joints, both inter-carpal  
91 joints and both subcutaneous calcaneal bursae) at 12 hours post-partum. Haematology and serum  
92 biochemistry were unremarkable for this foal, and synovial fluid was cytologically normal. A second  
93 university-owned foal (F5), born after 406 days gestation, with characteristics of intra-uterine growth  
94 retardation and dysmaturity (small size, dished face, floppy ears, flexor laxity) required assistance to  
95 nurse. She had episcleral haemorrhage at birth, and synovial effusion of both carpal sheaths within  
96 12 h. Haematology and serum biochemistry were unremarkable, and she responded well to supportive  
97 care (intravenous fluids, supplementary feeding via an indwelling nasogastric tube, plasma  
98 transfusion, shoe extensions) on farm over 48 hours, but was represented at four days of age having  
99 been found submerged in a water trough. Other foals were presented within 48 hours of birth.

100

101 Group 2 foals consisted of four university owned foals aged between 7 and 25 days on initial  
102 assessment, with no abnormalities on veterinary examination (Table 1).

103

104 Group 3 comprised six research foals (two colts, four fillies) of mean age 47.7 days (range 44 to 52  
105 days) and mean body weight 111.2 kg (range 86 – 125 kg). All foals were Connemara cross breeding.  
106 Four were born unassisted with no abnormalities during gestation or parturition. Two foals (F1 and  
107 F6) were included after responding positively to supportive care as described above. All Group 3 foals  
108 were normal on veterinary examination at the time of recruitment into the study, and prior to each  
109 intervention.

110 Table 1: Foals available for inclusion in observational studies assessing non-invasive respiratory support. Group 1 foals were hospitalised for treatment of  
 111 multiple problems including respiratory insufficiency. Group 2 foals were healthy foals < 28 days of age. A number of foals (F2, F5, F6 and F8) were  
 112 evaluated on multiple occasions. Arterial blood gas (ABG) samples were obtained from all foals at baseline (ambient conditions, standing and/or  
 113 recumbent), following respiratory support with oxygen supplementation (O<sub>2</sub> supp) by nasal insufflation (F1) or mask and bi-level positive airway pressure  
 114 (biPAP) with (+O<sub>2</sub>) or without oxygen supplementation. For Group 1 foals, oxygen flow was 4 L/min (F4), 5 L/min (F5, F5'), 6 L/min (F3) or 7 L/min (F1, F2,  
 115 F2') and biPAP settings were 4/20 cm H<sub>2</sub>O (expiratory / inspiratory pressure: F1, F2, F2'), 5/15 cm H<sub>2</sub>O (F2'', F3), 4/15 H<sub>2</sub>O (F4, F5, F5'). For Group 2 foals,  
 116 oxygen flow was 8 L/min for F8', or 5 L/min for all other foals; biPAP pressures were 5/15 H<sub>2</sub>O for all foals except F5' (4/15 cm H<sub>2</sub>O). Group 1 foals were  
 117 manually restrained in lateral recumbency; Group 2 foals were sedated prior to restraint in lateral recumbency.

| Foal           | Signalment     | Age (d) | BW (kg) | Reason for presentation  | Standing                                   |                 | Recumbent      |                 | O <sub>2</sub> supp |                 | biPAP          |                 | biPAP+O <sub>2</sub> |                 | Recovery       |                 | biPAP effect                                 |  |
|----------------|----------------|---------|---------|--------------------------|--------------------------------------------|-----------------|----------------|-----------------|---------------------|-----------------|----------------|-----------------|----------------------|-----------------|----------------|-----------------|----------------------------------------------|--|
|                |                |         |         |                          | O <sub>2</sub>                             | CO <sub>2</sub> | O <sub>2</sub> | CO <sub>2</sub> | O <sub>2</sub>      | CO <sub>2</sub> | O <sub>2</sub> | CO <sub>2</sub> | O <sub>2</sub>       | CO <sub>2</sub> | O <sub>2</sub> | CO <sub>2</sub> |                                              |  |
| <i>Group 1</i> |                |         |         |                          |                                            |                 |                |                 |                     |                 |                |                 |                      |                 |                |                 |                                              |  |
| F1             | TB colt        | 1       | 45      | NMMS, resp insuff, FPT   | FiO <sub>2</sub> /CO <sub>2</sub> max (%)  |                 | 21.1           | 5.5             | - n/a -             |                 |                |                 | 34.6                 | 5.8             |                |                 | ↑O <sub>2</sub> , min effect CO <sub>2</sub> |  |
|                |                |         |         |                          | PaO <sub>2</sub> /PaCO <sub>2</sub> (mmHg) |                 | 39             | 57              | 152                 | 55              |                |                 | 62                   | 58              | 58             | 55              |                                              |  |
| F2             | Con x SB colt  | 0       | 36      | Resp insuff              | FiO <sub>2</sub> /CO <sub>2</sub> max (%)  |                 | 20.7           | 5.3             | - n/a -             |                 |                |                 | 42.9                 | 3.0             |                |                 | ↑O <sub>2</sub> , ↓ CO <sub>2</sub>          |  |
|                |                |         |         |                          | PaO <sub>2</sub> /PaCO <sub>2</sub> (mmHg) |                 | 44             | 52              | 45                  | 52              |                |                 | 92                   | 50              | 62             | 54              |                                              |  |
| F2'            |                | 1       | 40      | Re-evaluate              | FiO <sub>2</sub> /CO <sub>2</sub> max (%)  |                 | 21.0           | 4.9             | - n/a -             |                 | 20.5           | 5.3             |                      |                 | 21.0           |                 | minimal effect                               |  |
|                |                |         |         |                          | PaO <sub>2</sub> /PaCO <sub>2</sub> (mmHg) |                 | 38             | 50              | 42                  | 52              | 47             | 53              |                      |                 | 47             | 53              |                                              |  |
| F2''           |                | 7       | 45      | Re-evaluate              | FiO <sub>2</sub> /CO <sub>2</sub> max (%)  | 21.0            | 4.3            | 20.2            | 3.7                 |                 |                | 21.1            | 3.4                  |                 |                |                 | minimal effect                               |  |
|                |                |         |         |                          | PaO <sub>2</sub> /PaCO <sub>2</sub> (mmHg) | 61              | 51             | 65              | 56                  |                 |                | 62              | 57                   |                 |                |                 |                                              |  |
| F3             | SB colt        | 1       | 50      | NMMS                     | FiO <sub>2</sub> /CO <sub>2</sub> max (%)  |                 | 20.7           | 5.7             |                     |                 |                |                 | 36.8                 | 4.4             | 21.0           | 5.9             | ↓O <sub>2</sub> , ↑CO <sub>2</sub>           |  |
|                |                |         |         |                          | PaO <sub>2</sub> /PaCO <sub>2</sub> (mmHg) |                 | 73             | 52              |                     |                 |                |                 | 54                   | 60              | 73             | 47              |                                              |  |
| F4             | SB colt        | 0       | 50      | NMMS, ALD, flexor laxity | FiO <sub>2</sub> /CO <sub>2</sub> max (%)  |                 | 20.0           | 2.9             |                     |                 |                |                 | 29.1                 | 4.5             |                |                 | ↑O <sub>2</sub> , ↓ CO <sub>2</sub>          |  |
|                |                |         |         |                          | PaO <sub>2</sub> /PaCO <sub>2</sub> (mmHg) |                 | 65             | 52              |                     |                 |                |                 | 149                  | 51              |                |                 |                                              |  |
| F5             | Con x TB filly | 4       | 35      | NMMS, dysmature          | FiO <sub>2</sub> /CO <sub>2</sub> max (%)  | 20.8            | 4.8            | 20.6            | 5.6                 | 46.8            | 5.6            |                 | 38.6                 |                 | 21.0           | 5.1             | ↑O <sub>2</sub> , ↓ CO <sub>2</sub>          |  |
|                |                |         |         |                          | PaO <sub>2</sub> /PaCO <sub>2</sub> (mmHg) | 85              | 51             | 82              | 51                  | 192             | 56             |                 | 129                  | 48              | 82             | 50              |                                              |  |
| F5'            |                | 29      | 65      | Re-evaluate              | FiO <sub>2</sub> /CO <sub>2</sub> max (%)  | 21.0            | 5.1            | 21.3            | 5.9                 |                 |                |                 | 26.6                 | 5.3             |                |                 | ↑O <sub>2</sub> , ↓ CO <sub>2</sub>          |  |

|                |                |    |     |             | PaO <sub>2</sub> /PaCO <sub>2</sub> (mmHg) |      |     |      |     |         |      |      | 115 48 |         |                                    |                                    |  |
|----------------|----------------|----|-----|-------------|--------------------------------------------|------|-----|------|-----|---------|------|------|--------|---------|------------------------------------|------------------------------------|--|
| <i>Group 2</i> |                |    |     |             |                                            |      |     |      |     |         |      |      |        |         |                                    |                                    |  |
| F6             | Con x TB colt  | 7  | 56  | NAD         | FiO <sub>2</sub> /CO <sub>2</sub> max (%)  | 21.0 | 7.9 | 20.9 | 5.2 | - n/a - | 21.2 | 6.0  |        |         |                                    | minimal effect                     |  |
|                |                |    |     |             | PaO <sub>2</sub> /PaCO <sub>2</sub> (mmHg) | 84   | 46  | 82   | 47  | 95      | 48   | 81   | 55     |         |                                    |                                    |  |
| F6'            |                | 13 | 69  | Re-evaluate | FiO <sub>2</sub> /CO <sub>2</sub> max (%)  | 20.4 | 4.3 | 20.6 | 4.1 | 28.8    | 6.4  | 22.1 | 5.8    | 20.6    | 4.7                                | minimal effect                     |  |
|                |                |    |     |             | PaO <sub>2</sub> /PaCO <sub>2</sub> (mmHg) | 83   | 48  | 72   | 48  | 75      | 57   | 74   | 50     | 73      | 50                                 |                                    |  |
| F7             | Con x SB filly | 13 | 67  | NAD         | FiO <sub>2</sub> /CO <sub>2</sub> max (%)  | 20.7 | 5.1 | 21.1 | 5.6 | 66.4    | 9.7  | 30.6 | 7.3    | - n/a - | ↓O <sub>2</sub> , ↑CO <sub>2</sub> |                                    |  |
|                |                |    |     |             | PaO <sub>2</sub> /PaCO <sub>2</sub> (mmHg) | 97   | 47  | 79   | 50  | 191     | 68   | 38   | 73     | 71      | 55                                 |                                    |  |
| F8             | Con x TB filly | 11 | 63  | NAD         | FiO <sub>2</sub> /CO <sub>2</sub> max (%)  | 20.6 | 5.1 | 21.1 | 5.0 | 52.2    | 5.3  | 44.9 | 5.6    | 20.3    | 5.3                                | ↑O <sub>2</sub> , ↑CO <sub>2</sub> |  |
|                |                |    |     |             | PaO <sub>2</sub> /PaCO <sub>2</sub> (mmHg) | 89   | 49  | 74   | 49  | 139     | 53   | 167  | 52     | 77      | 50                                 |                                    |  |
| F8'            |                | 38 | 104 | Re-evaluate | FiO <sub>2</sub> /CO <sub>2</sub> max (%)  |      |     | 21.1 | 3.5 | n/a     |      | 57.0 | 3.9    | 21.2    | 4.8                                | ↑O <sub>2</sub> , ↑CO <sub>2</sub> |  |
|                |                |    |     |             | PaO <sub>2</sub> /PaCO <sub>2</sub> (mmHg) |      |     | 77   | 47  | 164     | 56   | 244  | 54     | 87      | 52                                 |                                    |  |
| F2             | Con x SB colt  | 25 | 79  | NAD         | FiO <sub>2</sub> /CO <sub>2</sub> max (%)  | 20.8 | 5.2 | 20.1 | 5.3 | 37.7    | 6.2  | 28.6 | 7.8    | 20.6    | 5.1                                | ↑O <sub>2</sub> , ↑CO <sub>2</sub> |  |
|                |                |    |     |             | PaO <sub>2</sub> /PaCO <sub>2</sub> (mmHg) | 95   | 51  | 88   | 54  | 149     | 58   | 191  | 62     | 85      | 50                                 |                                    |  |

118 BW, body weight; TB, Thoroughbred; SB, Standardbred; Con, Connemara; NMMS, neonatal multisystemic maladjustment syndrome; resp insuff, respiratory  
119 insufficiency; FTP, failure of passive immune transfer; ALD, angular limb deformity; NAD, no abnormality detected (healthy foal); FiO<sub>2</sub>, inspired oxygen  
120 concentration; CO<sub>2</sub>max, maximum expired carbon dioxide; PaO<sub>2</sub>, arterial partial pressure of O<sub>2</sub>; PaCO<sub>2</sub>, arterial partial pressure of CO<sub>2</sub>; O<sub>2</sub> supp, supplementary  
121 oxygen at 5 to 8L/min; recovery, values obtained after discontinuing respiratory support; biPAP effect, comparison between biPAP and results obtained  
122 without respiratory support; n/a, not available; cf, compared to.

123 *Group 1 (foals hospitalised for treatment of respiratory insufficiency)*

124 Group 1 foals were included with owner consent if they had evidence of respiratory insufficiency  
125 defined as hypoxaemia ( $\text{PaO}_2 < 85 \text{ mmHg}$ ) or hypercapnia ( $\text{PaCO}_2 > 50 \text{ mmHg}$ ). Blood gas analysis  
126 (GEM Premier, Model 3500; Abacus ALS, Macquarie Park, Australia) was performed on anaerobically  
127 collected samples to determine partial pressures of oxygen and carbon dioxide ( $\text{PaO}_2$  and  $\text{PaCO}_2$ ,  
128 respectively), haemoglobin saturation ( $\text{sO}_2$ ) and pH. At the discretion of treating veterinarians, foals  
129 were assessed sequentially breathing room air, following administration of supplementary  $\text{O}_2$  (5  
130 L/min) by nasal insufflation or via a large veterinary anaesthesia mask (Size 4, 115 / 43 mm; VetQuip,  
131 Eastern Creek, NSW), and following administration of biPAP with or without supplementary  $\text{O}_2$ .  
132 Respiratory support (biPAP) was delivered via the veterinary anaesthesia mask connected to a vented  
133 non-rebreathing elbow valve (Oracle 2 Vented Non-rebreathing Valve, 400HC206, Fisher and Paykel  
134 Healthcare, Nunawading, Victoria, Australia) and hence to a commercial, bi-level pressure support  
135 ventilator specifically designed for non-invasive mask ventilation (VPAP™ III ST, ResMed Ltd, Bella  
136 Vista, NSW) via standard air tubing (ResMed Ltd, Bella Vista, NSW) of two metre length  
137 (Supplementary Figure S1). Based on previous findings, a minimum respiratory rate (RR) of 15 bpm  
138 was set on the ventilator, such that a breath would be initiated if spontaneous ventilation fell below  
139 this rate. Inspiratory pressure (IPAP) was set at 15 cmH<sub>2</sub>O, and expiratory pressure (EPAP) was set at  
140 5 cmH<sub>2</sub>O. The maximum duration of IPAP was 1.2s to prevent prolonged inspiration, minimum  
141 duration of IPAP set at 0.5s to prevent false triggering, and the I:E ratio was 1:2.3. Analysis of inspired  
142 and expired gases ( $\text{FiO}_2$  and  $\text{CO}_2\text{max}$ ; PowerLab 4/25, Gas Analyser ML206 and LabChart 8 software;  
143 ADInstruments, Bella Vista, NSW) was performed by attaching a gas sampling port to the anaesthetic  
144 mask or by inserting a gas sampling tubing into the nares, and following two point calibration with  
145 room air (20.9%  $\text{O}_2$ , 0.04%  $\text{CO}_2$ ) and Carbogen (95%  $\text{O}_2$ , 5%  $\text{CO}_2$ ; BOC Gas, Wagga Wagga, NSW). Pulse  
146 oximetry ( $\text{SpO}_2$ ) was performed, when possible, with a transmission probe (Avant 2120, Nonin Medical  
147 Inc., Plymouth, MN, USA; distributed by Proact Medical Systems, Port Macquarie, NSW, Australia)  
148 placed on the tongue. Results were recorded when the signal was constant over two minutes, pulse



149 rate matched heart rate, and pulse strength was satisfactory. Pulse oximetry was not possible when  
150 the anaesthetic mask was in place.

151

152 Foals were restrained in lateral recumbency, without sedation, by final year veterinary students on  
153 clinical rotation, who were also responsible for holding the mask in place and continuous observation  
154 of respiratory rate and effort. Each respiratory intervention was of  $\geq 10$  minutes duration.  
155 Assessments were repeated on two university-owned foals, as shown in Table 1.

156

157 *Group 2 (healthy foals)*

158 Group 2 foals were healthy university-owned foals managed in a similar manner to Group 1 foals,  
159 assessed sequentially whilst breathing room air, supplementary O<sub>2</sub> and after administration of biPAP.  
160 Assessments were repeated on two foals, as shown in Table 1. Lateral recumbency was induced in  
161 Group 2 foals by administration of intravenous injections of diazepam (0.2 mg/kg; Parnell  
162 Laboratories, Alexandria, Australia), followed by xylazine (0.02 mg/kg; Illium Veterinary Products,  
163 Glendenning, Australia) and fentanyl (5  $\mu$ g/kg; Hospira, Melbourne, Australia). Each respiratory  
164 intervention was of  $\geq 10$  minutes duration. BiPAP settings were as described for Group 1 foals.

165

166 *Group 3 (healthy foals, pharmacological induction of respiratory insufficiency)*

167 A randomised crossover design was used with the first treatment assigned (either biPAP or mask O<sub>2</sub>)  
168 determined by coin toss (Supplementary Table S1). Treatment order was reversed for the next data  
169 collection day for each foal. The interval between intervention periods ranged from three to six days,  
170 and the cross over design included treatment in both left (Phase 1) and right lateral recumbency  
171 (Phase 2) for each foal.

172

173 Prior to each study, foals were manually restrained for veterinary examination and collection of  
174 baseline arterial blood samples from the distal carotid arteries (T-1). A 16G, 89 mm catheter (Terumo

175 Surflo, Macquarie Park, Australia) was placed in the jugular vein of each foal and a baseline sample of  
176 venous blood was collected from each foal prior to sedation. Blood gas analysis was performed as  
177 described for Group 1 foals. Spirometry was performed on standing foals as previously described  
178 (Raidal, McKean et al. 2019) by application of a large veterinary anaesthesia mask (SurgiVet large  
179 canine mask, product number 32393B1; Sound Veterinary Equipment, Rowville, Australia) placed on  
180 the foal's muzzle in such a way as to exclude air leaks and to minimise dead space, but not prevent  
181 opening of the nares. A respiratory flow head (Respiratory Flow Head 300 L, MLT300L, ADInstruments,  
182 Bella Vista, Australia) and gas sampling port were connected to the anaesthesia mask. Dead space of  
183 this apparatus was 60 mL (measured by water displacement). Data were collected for up to 60 seconds  
184 (sufficient to ensure 10 artefact free breath cycles) in unsedated foals, and analysed using PowerLab  
185 4/25, Gas Analyser ML206 and LabChart 8 software (ADInstruments, Bella Vista, Australia). Tidal  
186 volume ( $V_t$ ), peak inspiratory and peak expiratory air flow (PIF, PEF), and the duration of inspiratory  
187 (Ti) and expiratory (Te) phases were determined by post-sampling analysis of six consecutive and  
188 artefact free breath cycles representative of tidal breathing. Spirometry, inspired and expired gas  
189 analysis ( $F_{iO_2}$ ,  $F_{eO_2}$ ,  $F_{iCO_2}$  and  $F_{eCO_2}$ ) were performed following calibration of the spirometer pod  
190 using a using a seven litre certified calibration syringe (Hans Rudolph Incorporated, Shawnee, Kansas,  
191 USA) and the gas analyser was calibrated using a two point calibration of room air (20.9%  $O_2$ , 0.04%  
192  $CO_2$ ) and Carbogen (95%  $O_2$ , 5%  $CO_2$ ; BOC Gas, Wagga Wagga, Australia). Pulse oximetry ( $SpO_2$ ) was  
193 performed, when possible, as described for Group 1 foals.

194

195 Diazepam (0.2 mg/kg) was administered via the intravenous catheter, and spirometry (T0) was  
196 repeated five minutes following treatment. Fentanyl (5  $\mu$ g/kg; Hospira, Melbourne, Australia) and  
197 xylazine (0.02mg/kg; Illium Veterinary Products, Glendenning, Australia) were administered via the  
198 jugular catheter, and foals were placed in lateral recumbency. A 22G, 2.5cm polyurethane catheter  
199 (Surflo, Terumo Australia Pty Ltd, Macquarie Park, Australia) was placed aseptically into the lateral  
200 metatarsal artery, and an arterial blood sample collected anaerobically (T0). Foals were monitored by

201 determination of cardinal signs (HR, RR, temperature, MAP), arterial blood gases (PaO<sub>2</sub>, PaCO<sub>2</sub>, sO<sub>2</sub>,  
 202 pH), spirometry and inspired/expired gas analysis. Spirometry data were collected over 20 to 40 s,  
 203 after collection of arterial blood samples, to minimise any effects attributable to apparatus dead  
 204 space. All foals were sampled 10 min following administration of diazepam (T0), and respiratory  
 205 suppression was induced by continuous infusion of fentanyl (0.005 mg/kg/hr) and xylazine (0.7  
 206 mg/kg/hr) in 0.9% sodium chloride delivered via syringe pump (Alaris IMED Gemini PC-1 infusion  
 207 pump; VetQuip Pty Ltd, Erskine Park, NSW), commencing at T0. Samples were again collected after 10  
 208 minutes spontaneous respiration (10 minutes following commencement of the fentanyl-xylazine CRI,  
 209 T1), and respiratory support (biPAP or O<sub>2</sub> supplementation) was commenced 10 minutes following at  
 210 this time. The treatment and sample schedule is shown in Table 2.

211

212 Table 2: Treatment and sampling schedule for Group 3 foals. Baseline data were collected from  
 213 standing, unsedated foals at T-1. Spirometry was performed at T0 in standing foals 5 minutes  
 214 following administration of diazepam. Arterial blood gas, heart rate, respiratory rate and  
 215 temperature were collected from recumbent foals within 5 to 10 minutes of the administration of a  
 216 bolus injection of fentanyl and xylazine. A continuous infusion of fentanyl and xylazine in 0.9%  
 217 sodium chloride delivered via syringe pump was commenced at the end of T0 (10 minutes lateral  
 218 recumbency). Foals were randomised, in pairs, to receive oxygen administration (8L/min, O<sub>2</sub>) or non-  
 219 invasive ventilation (biPAP at inspiratory pressure of 15 cmH<sub>2</sub>O and expiratory pressure at 5 cmH<sub>2</sub>O,  
 220 with oxygen administration at 8L/min) at T2, with the reciprocal treatment administered at T4.  
 221 Treatment order (biPAP / oxygen administration) was reversed in the second replicate. Spiro =  
 222 spirometry and inspired/expired gas analysis; ABG = arterial blood gas; TPR = temperature, heart  
 223 (pulse) rate, respiratory rate and mean arterial pressure; SpO<sub>2</sub>, pulse oximetry.

224

| Time | Position | Sedation | Respiratory support                                       | Spiro                   | ABG | TPR | MAP | SpO <sub>2</sub> |
|------|----------|----------|-----------------------------------------------------------|-------------------------|-----|-----|-----|------------------|
| T-1  | 0 min    | Standing | Nil                                                       | Nil                     | ✓   | ✓   | ✓   |                  |
| T0   | 10 min   | Standing | Diazepam 0.2mg/kg                                         | Nil                     | ✓   |     | ✓   |                  |
|      |          | Lateral  | Fentanyl 5 µg/kg +<br>xylazine 0.02mg/kg;<br>commence CRI | Nil                     |     | ✓   |     | ✓                |
| T1   | 20 min   | Lateral  | CRI                                                       | Nil                     | ✓   | ✓   | ✓   | ✓                |
| T2   | 30 min   | Lateral  | CRI                                                       | O <sub>2</sub> or biPAP | ✓   | ✓   | ✓   | ✓                |
| T3   | 40 min   | Lateral  | CRI                                                       | Nil                     | ✓   | ✓   | ✓   | ✓                |
| T4   | 50 min   | Lateral  | CRI                                                       | biPAP or O <sub>2</sub> | ✓   | ✓   | ✓   | ✓                |
| T5   | 60 min   | Lateral  | End CRI                                                   | Nil                     | ✓   | ✓   | ✓   | ✓                |

225  
226 Respiratory support (biPAP or O<sub>2</sub> supplementation) was delivered via the large veterinary anaesthesia  
227 mask used for spirometry measurements. The mask was connected to a vented non-rebreathing  
228 elbow valve (Oracle 2 Vented Non-rebreathing Valve, 400HC206, Fisher and Paykel Healthcare,  
229 Nunawading, Victoria, Australia), and hence to a commercial, bi-level pressure support ventilator, as  
230 described for Group 1 foals. Oxygen delivery (8 L/min) was inserted into the system between the non-  
231 rebreathing valve and the ventilator tubing, as shown (Supplementary Figure S1). A pressure  
232 manometer (Advanced Anaesthetic Services, Gladesville, Australia) was connected to the biPAP  
233 ventilator to enable circuit pressure monitoring. Spirometry and gas sampling were performed by  
234 inserting the respiratory flow head and gas sampling port between the one-way valve and mask, as  
235 shown in Supplementary Figure 1, at the end of each respiratory intervention and after collection of  
236 arterial blood samples. Temperature, HR, RR and MAP were recorded over the final two minutes of  
237 each respiratory intervention. Pulse oximetry (SpO<sub>2</sub>) could not be performed during mask  
238 administration of O<sub>2</sub> or biPAP because the transmission probe could not be placed on the tongue.

239

#### 240 *Statistical methods*

241 Power analysis from previous studies demonstrated that a sample size of six foals would discriminate  
242 differences in PaO<sub>2</sub> and PaCO<sub>2</sub> of 15 mmHg and 5mmHg, respectively, with a power > 0.80 and  
243  $\alpha=0.05$ . Results from Group 1 and Group 2 foals are presented as raw data only due to the small  
244 number of foals in each group. A cross-over design was selected for the interventional study to further  
245 increase statistical power and to control for individual differences and possible effects attributable to  
246 treatment order. Data were tested for normality by the Shapiro-Wilks test and explored using  
247 appropriate descriptive statistics. The effect of replicate (Phase 1 or Phase 2) and sequence (O<sub>2</sub> or  
248 biPAP at T2 with reciprocal treatment at T4) were evaluated by fitting separate mixed effects models  
249 using restricted maximum likelihood (REML) with time and replicate or sequence as random factors  
250 and foal as a fixed factor. In the absence of significant replicate or sequence effects, treatment effects

251 (biPAP vs O<sub>2</sub>) were determined by mixed effects models with time as a random factor and subject as  
252 a fixed factor and post-hoc testing by Tukey's method. Non-parametric results were analysed by  
253 Kruskal-Wallis test, with post-hoc testing by Dunn's method. Relationships between PaO<sub>2</sub>, sO<sub>2</sub> and  
254 pulse oximetry (SpO<sub>2</sub>), and between maximum CO<sub>2</sub> in expired air (CO<sub>2</sub>max) and PaCO<sub>2</sub>, were explored  
255 using Pearson's correlation; Bland-Altman analyses were used to assess agreement between these  
256 indices. Unless specifically stated, data satisfied criteria for normality and parametric tests were used.  
257 Significance was accepted as P<0.05 and all analyses were performed using Graph Pad Prism 8.4.3 for  
258 Windows, GraphPad Software, San Diego, California USA, [www.graphpad.com](http://www.graphpad.com)).

259

## 260 **Results**

### 261 *Group 1 foals*

262 Three foals (F2, F4, F5) displayed a beneficial response to initial biPAP treatment, evidenced by  
263 increased PaO<sub>2</sub> and decreased PaCO<sub>2</sub> (Table 1). One foal (F1) demonstrated an improved PaO<sub>2</sub>, but  
264 minimal change to PaCO<sub>2</sub> associated with treatment. On second and third treatment, F2 demonstrated  
265 minimal response, whereas repeat treatment of F5 demonstrated a similar beneficial effect to that  
266 observed after the first treatment. Importantly, however, F3 demonstrated reduced PaO<sub>2</sub> and  
267 increased PaCO<sub>2</sub> following 10 minutes of biPAP treatment. These changes were rapidly reversed when  
268 biPAP was discontinued and the foal allowed to breathe room air. Changes in inspired gases did not  
269 appear to predict this foal's response to treatment, but respiratory rate decreased from 28 bpm to 10  
270 bpm and protracted periods of apnoea were noted during biPAP administration.

271

### 272 *Group 2 foals*

273 Two foals (F8 and F2) demonstrated improved oxygenation following biPAP, but all had increased  
274 PaCO<sub>2</sub> (Table 1). Minimal effect was seen for F6 on both the first and second occasion when biPAP was  
275 administered (without supplementary oxygen). A dramatic reduction in PaO<sub>2</sub> and increased PaCO<sub>2</sub>

276 were evidenced by F7 after biPAP, but changes were rapidly corrected when the foal was allowed to  
277 breathe room air. Increased CO<sub>2</sub> was evident in analysis of expired gases during mask O<sub>2</sub>  
278 supplementation and biPAP, suggesting that some degree of rebreathing occurred for this foal.  
279 Respiratory and heart rates did not vary during mask O<sub>2</sub> administration or biPAP for this foal, but MAP  
280 increased (from 99 to 108 mmHg during other interventions, to 134 mmHg during biPAP) and SpO<sub>2</sub>  
281 decreased to 89% (from 94 to 97% at FiO<sub>2</sub> 21%) during biPAP.

282

### 283 *Group 3 foals*

284 No effects attributable to replicate were observed for any parameter. Effects associated with  
285 sequence (biPAP or supplementary O<sub>2</sub> at T2) are shown in supplementary materials. Heart and  
286 respiratory rates were highest in unsedated foals, and temperature decreased significantly  
287 throughout the study period (from 38.5°C to 37.8°C). Mean arterial pressure did not change associated  
288 with time or treatment (Supplementary Figure S2).

289

290 Oxygenation (PaO<sub>2</sub>) was greater in unsedated foals (T-1) than observed in sedated foals at T0 (P=0.002)  
291 or T1 (P=0.004, Figure 1). The administration of supplementary oxygen alone or with biPAP was  
292 associated with significantly increased PaO<sub>2</sub> in comparison to results at all other sampling times (all  
293 P<0.001), and results following biPAP were significantly greater than after O<sub>2</sub> administration  
294 (P=0.021). Arterial CO<sub>2</sub> (PaCO<sub>2</sub>) results were not normally distributed and were resistant to  
295 transformation. Values were lowest in unsedated foals at T-1, and differences at this time and at T0  
296 were significant when compared to results following administration of supplementary O<sub>2</sub> and  
297 following biPAP (all P<0.001, Figure 1); differences at other times were not significant. Results  
298 following supplementary O<sub>2</sub> administration were not significantly different to those obtained after  
299 biPAP (P=1.000). Hypercapnia (PaCO<sub>2</sub> > 60 mmHg) was observed for two foals (F8 and F9) following O<sub>2</sub>  
300 administration (60mmHg and 66 mmHg, respectively), and following biPAP on both occasions for F9  
301 (60 mmHg and 68 mmHg). Changes to blood pH mirrored changes to PaCO<sub>2</sub> and effects on lactate and

302 blood glucose treatment attributable to treatment were not observed (Supplementary Figure 3).  
303 Blood glucose concentrations increased across all sampling times (likely due to administration of  
304 xylazine), with results at T3 ( $P=0.013$ ) and T5 ( $P=0.008$ ) significantly higher than at T0, as were results  
305 during  $O_2$  ( $P=0.008$ ) and biPAP ( $P=0.016$ , data not shown).

306

307 Figure 1: Blood gas results for Group 3 foals. Sedation was associated with a significant decrease in  
308  $PaO_2$  at T0 ( $P=0.002$ ) and T1 ( $P=0.004$ ). The administration of supplementary oxygen by mask ( $O_2$ ) or  
309 during bi-level positive airway pressure ventilation (biPAP) was associated with a significant increase  
310 in  $PaO_2$  at all other time points (all  $P<0.001$ ), and results following biPAP were significantly greater  
311 than following  $O_2$ , as indicated. Results for arterial  $CO_2$  pressures were not normally distributed, and  
312 were resistant to transformation. Results at T-1 and T0 were significantly less than results following  
313  $O_2$  and biPAP, as shown (\*\*,  $P<0.001$ ), following analysis by Kruskal Wallis test. Differences in  $PaCO_2$   
314 were not different following  $O_2$  or biPAP ( $P=1.000$ ). Data are shown as mean (+), median (horizontal  
315 line) and quartiles (box), with whiskers and outliers determined by Tukey method.

316

317 Significant time-sequence interactions were observed for spirometry variables including respiratory  
318 rate during spirometry (RRs), tidal volume ( $V_t$ ), inspiratory time ( $T_i$ ), expiratory time ( $T_e$ ) and peak  
319 inspiratory flow (PIF) (Supplementary Figure S4); biPAP was associated with significantly lower RR  
320 ( $P=0.014$ ) and significantly longer inspiratory ( $P<0.001$ ) and expiratory ( $P=0.020$ ) times at T2 than  
321 observed following  $O_2$  administration at this time. Differences at other time points were not  
322 significant, so data have been combined for analysis of treatment effects. Sedation with diazepam at  
323 T0 was associated with a significant decrease in RRs relative to each other sampling times (Figure 2),  
324 except following biPAP (all  $P<0.050$ ). Respiratory rate (RRs) during biPAP was lower than was observed  
325 at T1 ( $P=0.041$ ), T3 ( $P=0.012$ ) or following  $O_2$  administration ( $P<0.001$ ). Tidal volume ( $V_t$ ) was greatest  
326 in standing foals following diazepam sedation (T0) and values observed at this time and in unsedated  
327 foals at T-1 were significantly greater than observed in recumbent foals with the exception of during  
328 biPAP (all  $P<0.05$ ). The administration of biPAP was associated with significantly greater  $V_t$  than was  
329 observed at T1 ( $P=0.001$ ), T3 ( $P<0.001$ ), T5 ( $P=0.011$ ) and during  $O_2$  administration ( $P<0.001$ ), and  
330 effects were more pronounced at T2 than at T4 (Supplementary Figure 4). Recumbency was associated

331 with a significant reduction in minute ventilation relative to results from standing, unsedated foals (T-  
332 1), but this effect was not observed during biPAP (Figure 2).

333

334 Figure 2: Spirometry and gas exchange results for Group 3 foals. Sedation was associated with a  
335 significant decrease in respiratory rate during spirometry (RRs) at T0, and this effect was significant  
336 ( $P<0.05$ ) in comparison with results at all other time point except during bi-level positive airway  
337 pressure ventilation (biPAP). Effects on tidal volume ( $V_t$ ) reciprocated those observed on RRs, with  
338 differences again observed at T0 ( $P<0.05$  when compared to other sampling points with the  
339 exception of during biPAP). Minute ventilation was greatest in standing, unsedated foals (T-1), and  
340 significant decreases were observed at all other sampling points (\*,  $P<0.05$ , \*\*,  $P<0.01$ ) except  
341 during biPAP. Inspiratory ( $T_i$ ) and expiratory ( $T_e$ ) times were longest in standing foals following  
342 sedation with diazepam (T0), but significant effects were observed only in comparison with T5  
343 ( $P=0.020$ ) for  $T_i$ . For  $T_e$ , comparisons between T0 and T-1 ( $P=0.008$ ),  $O_2$  ( $P=0.006$ ) and T5 ( $P=0.012$ )  
344 were significant. Significant time effects on peak expiratory (PEF) and inspiratory (PIF) flows are  
345 shown. The administration of biPAP was associated with greater  $O_2$  extraction than observed at any  
346 other time (\*\*, all  $P<0.01$ ). Oxygen extraction was also greater during mask  $O_2$  administration, as  
347 shown, and at T0 (standing foals following administration of diazepam) than at T3 ( $P=0.046$ ) or T5  
348 ( $P<0.001$ ). The elimination of  $CO_2$  was greatest at T0 than at any other time, except following biPAP  
349 (\*, all  $P<0.05$ ). Differences between effects observed following biPAP administration and at other  
350 times are shown. Data are shown as mean (+), median (horizontal line) and quartiles (box), with  
351 whiskers and outliers determined by Tukey method.

352

353 Significant effects were observed for both inspiratory and expiratory time, reflective of changes  
354 observed in RRs (Figure 2), but there was no effect on I:E ratio (data not shown). Peak inspiratory flow  
355 was greatest during biPAP (-1.52 L/s), and significant effects were observed compared to values  
356 obtained at T1 ( $P=0.005$ ) and T3 ( $P=0.037$ ). Expiratory flows were greatest in unsedated foals (T-1),  
357 and significant differences were observed at T1 ( $P=0.002$ ), T3 ( $P=0.016$ ) and during biPAP ( $P=0.003$ ).

358

359 Time and sequence effects were observed for data derived from analysis of inspired / expired gas  
360 composition due to differences following  $O_2$  administration or biPAP at T2 (Supplementary Figure S5).  
361 Differences at other time points were not significant, so data have been combined for analysis of  
362 treatment effects. As expected, the administration of supplementary  $O_2$  was associated with an  
363 increased  $FiO_2$  during both mask supplementation and biPAP, compared to  $FiO_2$  when breathing room  
364 air (all  $P<0.001$ ), and values were significantly greater during biPAP than during administration of  $O_2$



365 only (P=0.004). Oxygen concentrations in expired air were also greater following the administration  
366 of supplementary O<sub>2</sub>, but differences were not observed between mask O<sub>2</sub> administration and biPAP  
367 (P=0.172). Oxygen extraction was much greater during biPAP than at all other time points (all  
368 P<0.005), including during O<sub>2</sub> administration (P<0.001, Figure 2). Oxygen extraction was also greater  
369 during mask O<sub>2</sub> administration than at T1 (P<0.001) or T5 (P=0.004), and in standing foals at T0 relative  
370 to T3 (P=0.046) and T5 (P<0.001). Maximum concentrations of CO<sub>2</sub> (CO<sub>2</sub>max) were observed at T0 in  
371 standing foals following administration of diazepam and observed differences were significant in  
372 comparison with results at T-1 (P=0.016), T1 (P=0.0003), T3 (P=0.026), T5 (P=0.0002) and following O<sub>2</sub>  
373 administration (P=0.031). Results after biPAP were significantly greater than following O<sub>2</sub>  
374 administration (P=0.047). Minimum concentrations of CO<sub>2</sub> were observed during biPAP, and  
375 differences were significant in comparison with T3 (P=0.021) and T5 (P=0.013). The elimination of CO<sub>2</sub>  
376 was greatest at T0 in diazepam sedated foals, with significant differences observed between results  
377 at T0 and all other sampling points, with the exception of biPAP (all P<0.030, Figure 2). Results  
378 observed following biPAP were significantly greater than observed at T1 (P=0.047) or following O<sub>2</sub>  
379 administration (P=0.004).

380

### 381 *Monitoring*

382 Paired results for pulse oximetry (SpO<sub>2</sub>) and haemoglobin saturation determined by blood gas analysis  
383 (sO<sub>2</sub>) were available for 47 data sets from the current study. SpO<sub>2</sub> results correlated significantly with  
384 sO<sub>2</sub> (r=0.61, 95% CI 0.34 to 0.78, P<0.001), but there was poor agreement between these two methods  
385 of assessing haemoglobin saturation (Figure 3). Although bias was minimal (1.4%, standard deviation  
386 5.4%), the observed limits of agreement were large (-11.95 to 9.2%), and increased divergence was  
387 observed for results obtained from the most hypoxic foal. Paired results for CO<sub>2</sub>max and PaCO<sub>2</sub> were  
388 available for 136 data sets (Figure 3). There was poor but significant correlation between results  
389 (r=0.25, 95% CI 0.09 to 0.40, P=0.003), and agreement was poor (bias 14.0 ± 8.9%) with broad limits  
390 of agreement (-3.5 to 31.5%).

391

392 Figure 3: Associations between blood gas results and non-invasive measures of oxygenation (pulse  
393 oximetry, SpO<sub>2</sub>) and carbon dioxide accumulation (CO<sub>2</sub>max). Results are presented as correlations (a  
394 and c), with perfect agreement (unity) shown as a dotted line. Agreement is shown following Bland-  
395 Altman analysis (b and d), with the mean difference (dashed line) and limits of agreement (dotted  
396 lines) shown. Oxygenation of haemoglobin (sO<sub>2</sub>) and partial pressure of CO<sub>2</sub> (PaCO<sub>2</sub>) were  
397 determined from blood gas analyses.

398

## 399 Discussion

400 The administration of biPAP in the current study was associated with a positive response to treatment  
401 in four of five foals with respiratory disease (Group 1), and two of four healthy, sedated neonatal foals  
402 < 28 days age (Group 2). However, one healthy foal (F6) showed minimal response to initial treatment,  
403 and one foal in Group 1 showed minimal response to subsequent treatments (F2', F2''). More  
404 importantly, one foal with respiratory insufficiency (F3, Group 1) and one healthy Group 2 foal (F7)  
405 demonstrated hypoxia and hypercapnia following biPAP treatment. For F3 this was associated with  
406 decreased respiratory rate, suggesting inadequate alveolar ventilation might have caused this  
407 outcome. Conversely, for F7 this was associated with increased expired CO<sub>2</sub> during both mask O<sub>2</sub>  
408 administration and biPAP, suggesting that rebreathing or other mechanisms for CO<sub>2</sub> accumulation  
409 within equipment dead space might have contributed to hypercapnia in this case. Of clinical  
410 parameters that might have been observed in the absence of CO<sub>2</sub> monitoring, only MAP was increased  
411 for this foal.

412

413 Results from Group 3 foals demonstrated that improved blood oxygenation was achieved following  
414 both mask administration of supplementary O<sub>2</sub> and biPAP. Benefits associated with biPAP were  
415 greater, and were also associated with decreased RR, increased Vt and increased minute ventilation.  
416 Increased Vt represents a more efficient ventilation strategy than increased RR, as there is increased  
417 alveolar ventilation relative to ventilation of airway dead space, and decreased RR is likely to be  
418 associated with decreased work of breathing. Increased inspiratory pressure during biPAP was

419 associated with increased PIF, and the adverse effects on PEF observed during CPAP in previous  
420 studies (13) were not observed in the current study, presumably due to the lower expiratory pressures  
421 during biPAP ventilation. As expected, increased  $\text{FiO}_2$  was observed during mask administration of  
422 supplementary  $\text{O}_2$  and during biPAP, so observed increases in arterial oxygenation likely reflect the  
423 steeper diffusion gradient resulting from these changes. Surprisingly,  $\text{FiO}_2$  was higher during biPAP  
424 than during  $\text{O}_2$  administration to Group 3 foals. This was not observed for Group 1 or 2 foals, and is  
425 not expected during positive pressure treatments where increased flow is associated with decreased  
426 partial pressure of  $\text{O}_2$  (27). As the minimum inspired  $\text{CO}_2$  was greater during the administration of  
427 supplementary  $\text{O}_2$  than during biPAP, it is likely that mask administration of supplementary  $\text{O}_2$  in the  
428 current study was associated with  $\text{CO}_2$  retention, a problem avoided by the use of a non-rebreathing  
429 valve during biPAP, and by nasal insufflation of oxygen for Group 1 foals.

430

431 Increased  $\text{PaCO}_2$  was observed in Group 3 foals following respiratory support, including hypercapnia  
432 ( $\text{PaCO}_2 > 60$  mmHg) following  $\text{O}_2$  administration (two foals) or biPAP (one foal). Hypercapnia has been  
433 reported in response to  $\text{O}_2$  supplementation in human neonates (28) and foals (13, 29), and may be  
434 due to reduced respiratory drive, increased metabolic rate, hypoventilation due to sedation or effects  
435 of equipment dead space. As noted above, mask administration of supplementary  $\text{O}_2$  was associated  
436 with the accumulation of  $\text{CO}_2$  within equipment dead space (rebreathing) in the current study, but this  
437 was not observed during biPAP. Despite decreased RR, minute ventilation during biPAP was the same  
438 as observed in standing, unsedated foals in the current study suggesting that biPAP prevented reduced  
439 ventilation associated with sedation and recumbency. However, our hypothesis, that lower expiratory  
440 pressures and improved expiratory function would ameliorate hypercapnia was not demonstrated. As  
441 was observed during CPAP (13), the observed increases in  $\text{PaCO}_2$  and pH in the current study were  
442 modest, and consistent with current ventilation strategies that accept increased arterial  $\text{CO}_2$  tension  
443 and hypercapnic acidosis ('permissive hypercapnia') as acceptable consequences without adverse  
444 effects on outcome (30, 31), and with possible therapeutic effects (32). Sedation, and the

445 supraphysiological PaO<sub>2</sub> values observed in the current study, might have contributed to the observed  
446 hypercapnia in Group 2 and Group 3 foals. With the exception of one foal with markedly reduced RR,  
447 hypercapnia was not observed in Group 1 foals, where sedation was not required for respiratory  
448 support. Alternatively, Group 1 foals, with spontaneous respiratory insufficiency, might have been less  
449 susceptible to adverse effects of ventilatory support. A similar difference has been noted in human  
450 patients with recruitable air spaces (indicated by the presence of a lower inflection point in the  
451 inspiratory pressure-volume (PV) curve), in comparison to patients with no such inflection (21).  
452 Although we were unable to monitor PV curves in our study, it is possible that Group 1 foals with  
453 spontaneous disease responded more appropriately to the imposition of PEEP than Group 2 and 3  
454 foals with healthy lungs where the increased expiratory pressure might be more likely to cause  
455 pulmonary overdistension.

456

457 Although reversed within 10 minutes of cessation of biPAP, the adverse effects of biPAP on F3 (Group  
458 1) and F7 (Group 2), and the hypercapnia observed in Group 3 foals, demonstrate the necessity for  
459 close monitoring during the implementation of respiratory support in equine neonates. Evaluation of  
460 NIV should consider effects on both oxygenation and carbon dioxide. Direct measurement of PaO<sub>2</sub> and  
461 sO<sub>2</sub> by co-oximetry is more accurate than blood gas analysis for determination of oxygenation (33),  
462 but neither technique provides an immediate result or allows for continuous monitoring. Arterial  
463 samples can be difficult to obtain in hypovolaemic foals or animals with distal limb oedema, and risks  
464 associated with arterial puncture include pain, haemorrhage, arterial injury, aneurism formation,  
465 thrombosis and distal ischaemia. Pulse oximetry has been recommended as an appropriate alternative  
466 to invasive sampling for determination of haemoglobin saturation (34). Previous studies have  
467 suggested that placement of transmission or reflectance sensors on the lip or tongue ensures the most  
468 reliable assessment of SaO<sub>2</sub> in foals (34), although bias and limits of agreement in that study were  
469 similar to those observed in the current study and well outside accepted standards of care (35). Probe

470 placement on the tongue was not possible during mask administration of respiratory support in the  
471 current study, and was not tolerated by unsedated foals.

472

473 End-tidal CO<sub>2</sub> (PETCO<sub>2</sub>) is commonly monitored during anaesthesia as an indirect measure of PaCO<sub>2</sub>.  
474 Whilst PETCO<sub>2</sub> has been reported as an acceptable technique for monitoring of neonatal foals (34),  
475 studies during NIV in people have suggested that, as observed in the current study, the technique was  
476 not predictive of PaCO<sub>2</sub> or changes in PaCO<sub>2</sub> (36). The association between PETCO<sub>2</sub> and PaCO<sub>2</sub> assumes  
477 that the patient exhales fully, and that end-expiratory gases approximate gas composition in the  
478 alveoli. This assumption is not valid if, as we have hypothesised, our ventilated foals are not exhaling  
479 completely. For this reason peak expired CO<sub>2</sub> concentrations have been termed FeCO<sub>2</sub>max in the  
480 current study. Alternative techniques to assess ventilatory function, such as volume capnography and  
481 electrical impedance tomography (37), offer greater capacity to more accurately assess response to  
482 treatment.

483

484 A number of limitations are noted in the current study. The number of foals presented for  
485 management of respiratory disease was low and, for three of five foals, the degree of respiratory  
486 insufficiency was mild. Findings in healthy foals with pharmacologically-induced respiratory  
487 insufficiency may not be predictive of responses in neonates with spontaneous disease. We were  
488 unable to document alveolar ventilation, physiological dead space or PEEP<sub>i</sub> in the current study, which  
489 was designed to evaluate a readily available intervention and monitoring strategies that might be  
490 readily implemented in a practice setting. The assessment of non-invasive monitoring was based on a  
491 small number of observations, and the data set did not include results from foals with severe  
492 hypoxaemia or hypercapnia.

493

494 *Conclusions*

495 Consistent with previous studies evaluating CPAP, biPAP was an effective respiratory support strategy  
496 for healthy foals with pharmacologically induced respiratory insufficiency and for a small number of  
497 foals with spontaneous respiratory disease. BiPAP was associated with increased PaO<sub>2</sub>, more efficient  
498 gas exchange and changes in respiratory mechanics including increased tidal volume, decreased  
499 respiratory rate and increased peak inspiratory flow. The technique preserved minute ventilation in  
500 the face of reductions associated with sedation and recumbency observed at other times, but was  
501 associated with modest increases in PaCO<sub>2</sub>. As in previous studies, the use of a commercially available  
502 ventilator intended for at-home care of adults with chronic obstructive respiratory conditions or sleep  
503 apnoea represents an available and potentially cost effective option for use in equine practice,  
504 although there is a need for careful and frequent monitoring of patient oxygenation and ventilation  
505 during NIV. Our results suggest that monitoring of alveolar ventilation, PV curves and PEEP<sub>i</sub> might be  
506 important for effective NIV of foals and to better characterise the response of foals to respiratory  
507 support. The use of lower expiratory pressures in the current study did not prevent hypercapnia, and  
508 increases in PaCO<sub>2</sub> observed in the current study were similar to those observed during CPAP in  
509 healthy foals in previous studies. Similar increases were not observed in the majority of foals with  
510 respiratory disease suggesting that foals with pulmonary pathology might respond differently to foals  
511 with pharmacologically or centrally-induced respiratory suppression. Observed effects on were PaCO<sub>2</sub>  
512 were rapidly reversed and predominantly within acceptable bounds for permissive hypercapnia.  
513 Although not a primary objective of the current study, our results suggest the non-invasive monitoring  
514 approaches used in this study were not reliable, and techniques are needed for more accurate, non-  
515 invasive assessment of respiratory function in foals during NIV.

516

## 517 **Acknowledgements**

518 This study was funded by AgriFutures Australia. Numerous veterinary and equine science students  
519 assisted with restraint and care of foals (and their dams) including Cathrine Borgen-Nielsen, Tegan

520 Davis, Philippa Kellett and Stacey Walker. Special thanks go to Equine Centre staff at CSU for their  
521 dedicated and ongoing care of mares and foals, and to Jaymie Loy and Equine Science reproduction  
522 students for their care of mares and foals at foaling. ResMed Pty Ltd donated bi-level positive airway  
523 (biPAP) ventilators used in this study, and Jeff Armistead provided technical advice. This project was  
524 completed in partial fulfilment of Veterinary Honours for Lexi Burgemeestre.

525

## 526 References

- 527 1. Kosch PC, Koterba AM, Coons TJ, Webb AI. Developments in management of the newborn  
528 foal in respiratory distress 1: Evaluation. *Equine Vet J.* 1984;16(4):312-8.
- 529 2. Dubielzig RR. Pulmonary lesions of neonatal foals. *J Equine Med Surg.* 1977;1:419-25.
- 530 3. Koterba AM, Brewer BD, Tarplee FA. Clinical and clinicopathological characteristics of the  
531 septicaemic neonatal foal: review of 38 cases. *Equine Vet J.* 1984;16(4):376-82.
- 532 4. de Winter J, deVries M, Zimmermann L. Noninvasive respiratory support in newborns. *Eur J*  
533 *Pediatr.* 2010;169:777-82.
- 534 5. Hussain WA, Marks JD. Approaches to noninvasive respiratory support in preterm infants:  
535 From CPAP to NAVA. *NeoReviews.* 2019;20(4):e213-e21.
- 536 6. Bedwell S, Leasure AR, Gibson TL. Interventions for the management of respiratory distress  
537 in late preterm and term infants experiencing delayed respiratory transition: A systematic review.  
538 *Dimens Crit Care Nurs.* 2019;38(4):192-200.
- 539 7. Schmölder GM, Kumar M, Pichler G, Aziz K, O'Reilly M, Cheung PY. Non-invasive versus  
540 invasive respiratory support in preterm infants at birth: systematic review and meta-analysis. *Br Med*  
541 *J.* 2013;347:f5980.
- 542 8. DiBlasi RM. Nasal continuous positive airway pressure (CPAP) for the respiratory care of the  
543 newborn infant. *Resp Care.* 2009;54(9):1209-35.
- 544 9. Briganti A, Melanie P, Portela D, Breggi G, Mama K. Continuous positive airway pressure  
545 administered via face mask in tranquilized dogs. *J Vet Emerg Crit Care.* 2010;20(5):503-8.
- 546 10. MacFarlane PD, Mosing M. Early experience with continuous positive airway pressure (CPAP)  
547 in 5 horses -- a case series. *Can Vet J.* 2012;53(4):426-9.
- 548 11. Mosing M, Rysnik M, Bardell D, Cripps PJ, MacFarlane P. Use of continuous positive airway  
549 pressure (CPAP) to optimise oxygenation in anaesthetised horses--a clinical study. *Equine Vet J.*  
550 2012;45(4):414-8.
- 551 12. Staffieri F, Crovace A, De Monte V, Centonze P, Gigante G, Grasso S. Noninvasive continuous  
552 positive airway pressure delivered using a pediatric helmet in dogs recovering from general  
553 anesthesia. *J Vet Emerg Crit Care.* 2014;24(5):578-85.
- 554 13. Raidal SL, McKean R, Ellul PA, Nielsen SG, Quinn CT. Effects of continuous positive airway  
555 pressure on respiratory function in sedated foals. *J Vet Emerg Crit Care.* 2019;29(3):269-78.
- 556 14. Mosing M, MacFarlane P, Bardell D, Lüthi L, Cripps PJ, Bettschart-Wolfensberger R.  
557 Continuous positive airway pressure (CPAP) decreases pulmonary shunt in anaesthetized horses. *Vet*  
558 *Anaesth Analg.* 2016;43(6):611-22.
- 559 15. Ramaswamy VV, More K, Roehr CC, Bandiya P, Nangia S. Efficacy of non-invasive respiratory  
560 support modes for primary respiratory support in preterm neonates with respiratory distress  
561 syndrome: Systematic review and network meta-analysis. *Pediatr Pulmonol.* 2020;55(11):2940-63.



- 562 16. Rong ZH, Li WB, Liu W, Cai BH, Wang J, Yang M, et al. Nasal bi-level positive airway pressure  
563 (BiPAP) versus nasal continuous positive airway pressure (CPAP) in preterm infants  $\leq 32$  weeks: A  
564 retrospective cohort study. *J Paediatr Child Health*. 2016;52(5):493-8.
- 565 17. Gupta D, Nath A, Agarwal R, Behera D. A prospective randomized controlled trial on the  
566 efficacy of noninvasive ventilation in severe acute asthma. *Resp Care*. 2010;55(5):536-43.
- 567 18. Murphy PB, Rehal S, Arbane G, Bourke S, Calverley PMA, Crook AM, et al. Effect of Home  
568 Noninvasive Ventilation With Oxygen Therapy vs Oxygen Therapy Alone on Hospital Readmission or  
569 Death After an Acute COPD Exacerbation: A Randomized Clinical Trial. *JAMA*. 2017;317(21):2177-86.
- 570 19. Struik FM, Sprooten RT, Kerstjens HA, Bladder G, Zijnen M, Asin J, et al. Nocturnal non-  
571 invasive ventilation in COPD patients with prolonged hypercapnia after ventilatory support for acute  
572 respiratory failure: a randomised, controlled, parallel-group study. *Thorax*. 2014;69(9):826-34.
- 573 20. Blanch L, Fernández R, Benito S, Mancebo J, Net A. Effect of PEEP on the arterial minus end-  
574 tidal carbon dioxide gradient. *Chest*. 1987;92(3):451-4.
- 575 21. Blanch L, Bernabe F, Lucangelo U. Measurement of air trapping, intrinsic positive end-  
576 expiratory pressure, and dynamic hyperinflation in mechanically ventilated patients. *Resp Care*.  
577 2005;50(1):110-23.
- 578 22. Koutsoukou A, Bekos B, Sotiropoulou C, Koulouris NG, Roussos C, Milic-Emili J. Effects of  
579 positive end-expiratory pressure on gas exchange and expiratory flow limitation in adult respiratory  
580 distress syndrome. *Crit Care Med*. 2002;30(9):1941-9.
- 581 23. Puente-Maestu L, Stringer WW. Hyperinflation and its management in COPD. *Int J Chron*  
582 *Obstruct Pulmon Dis*. 2006;1(4):381-400.
- 583 24. Vieillard-Baron A, Jardin F. The issue of dynamic hyperinflation in acute respiratory distress  
584 syndrome patients. *Eur Resp J, Supp*. 2003;42:43s-7s.
- 585 25. Chakkarapani AA, Adappa R, Mohammad Ali SK, Gupta S, Soni NB, Chicoine L, et al. Current  
586 concepts of mechanical ventilation in neonates - Part 1: Basics. *Int J Pediatr Adolesc Med*.  
587 2020;7(1):13-8.
- 588 26. Koterba AM, Wozniak JA, Kosch PC. Ventilatory and timing parameters in normal horses at  
589 rest up to age one year. *Equine Vet J*. 1995;27(4):257-64.
- 590 27. Yoder EA, Klann K, Strohl KP. Inspired oxygen concentrations during positive pressure  
591 therapy. *Sleep Breath*. 2004;8(1):1-5.
- 592 28. Mortola JP, Frappell PB, Dotta A, Matsuoka T, Fox G, Weeks S, et al. Ventilatory and  
593 metabolic responses to acute hyperoxia in newborns. *Am Rev Respir Dis*. 1992;146(1):11-5.
- 594 29. Wong DM, Alcott CJ, Wang C, Hay-Kraus BL, Buchanan BR, Brockus CW. Physiologic effects of  
595 nasopharyngeal administration of supplemental oxygen at various flow rates in healthy neonatal  
596 foals. *Am J Vet Res*. 2010;71(9):1081-8.
- 597 30. Morales-Quinteros L, Camprubí-Rimblas M, Bringué J, Bos LD, Schultz MJ, Artigas A. The role  
598 of hypercapnia in acute respiratory failure. *Intensive Care Med Exp*. 2019;7(Suppl 1):39.
- 599 31. Vengust M. Hypercapnic respiratory acidosis: A protective or harmful strategy for critically ill  
600 newborn foals? *Can J Vet Res*. 2012;76:275-80.
- 601 32. Ijland MM, Heunks LM, van der Hoeven JG. Bench-to-bedside review: Hypercapnic acidosis  
602 in lung injury - from 'permissive' to 'therapeutic'. *Crit Care*. 2010;14(6):137.
- 603 33. Giguere S, Sanchez LC, Shih A. Accuracy of calculated arterial saturation in oxygen in  
604 neonatal foals and effects of monitor, sensor, site of sensor placement, and degree of hypoxemia on  
605 the accuracy of pulse oximetry. *J Vet Emerg Crit Care*. 2014;24(5):529-35.
- 606 34. Wong DM, Alcott CJ, Wang C, Bornkamp JL, Young JL, Sponseller BA. Agreement between  
607 arterial partial pressure of carbon dioxide and saturation of hemoglobin with oxygen values obtained  
608 by direct arterial blood measurements versus noninvasive methods in conscious healthy and ill foals.  
609 *J Am Vet Med Assoc*. 2011;239(10):1341-7.
- 610 35. Batchelder PB, Raley DM. Maximizing the laboratory setting for testing devices and  
611 understanding statistical output in pulse oximetry. *Anesth Analg*. 2007;105(6 Suppl):S85-94.



- 612 36. Piquilloud L, Thevoz D, Jolliet P, Revely JP. End-tidal carbon dioxide monitoring using a naso-  
613 buccal sensor is not appropriate to monitor capnia during non-invasive ventilation. *Ann Intensive*  
614 *Care*. 2015;5:2.
- 615 37. Mosing M, Auer U, MacFarlane P, Bardell D, Schramel JP, Bohm SH, et al. Regional  
616 ventilation distribution and dead space in anaesthetized horses treated with and without continuous  
617 positive airway pressure: novel insights by electrical impedance tomography and volumetric  
618 capnography. *Vet Anaesth Analg*. 2018;45(1):31-40.

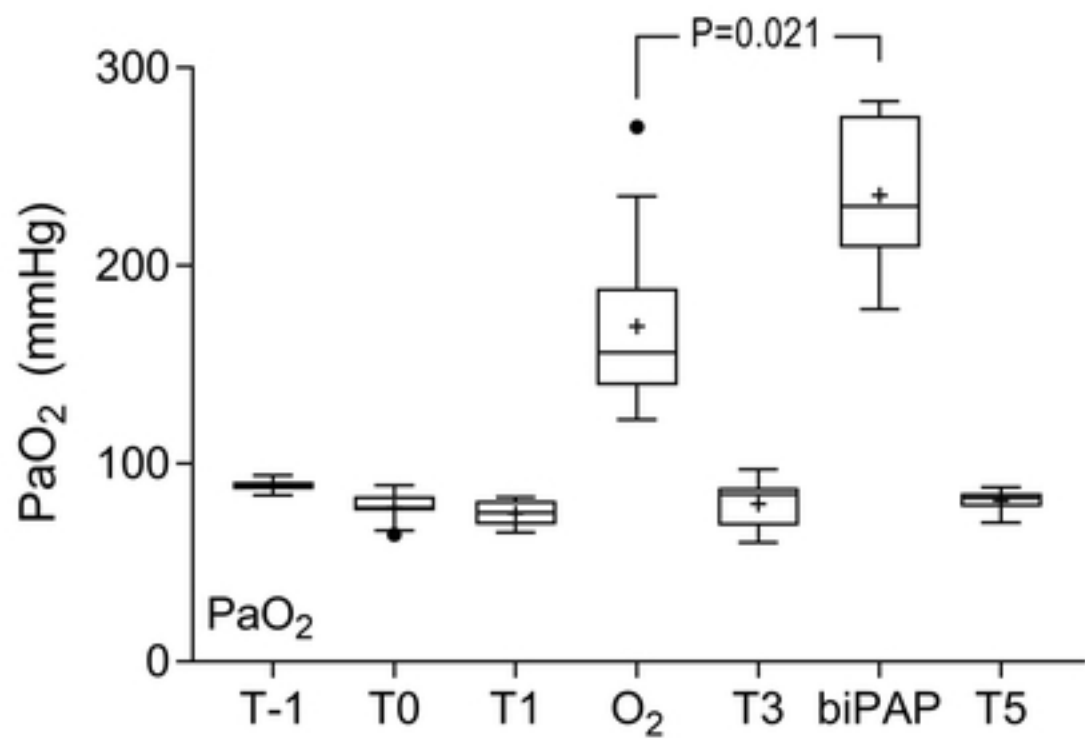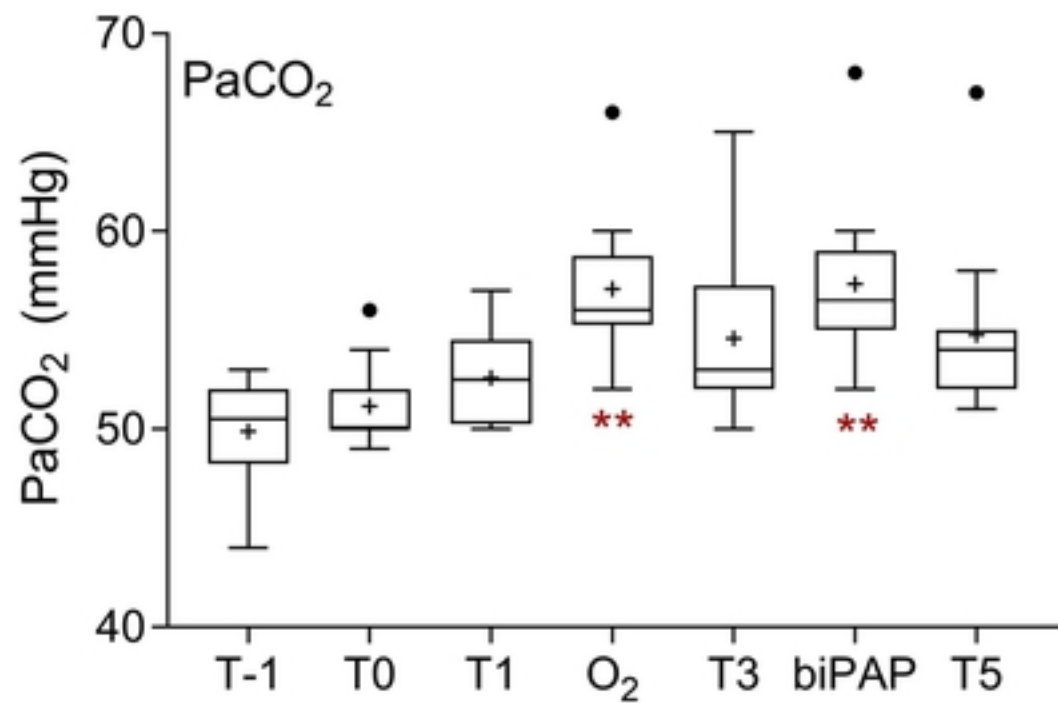

Fig 1.tif

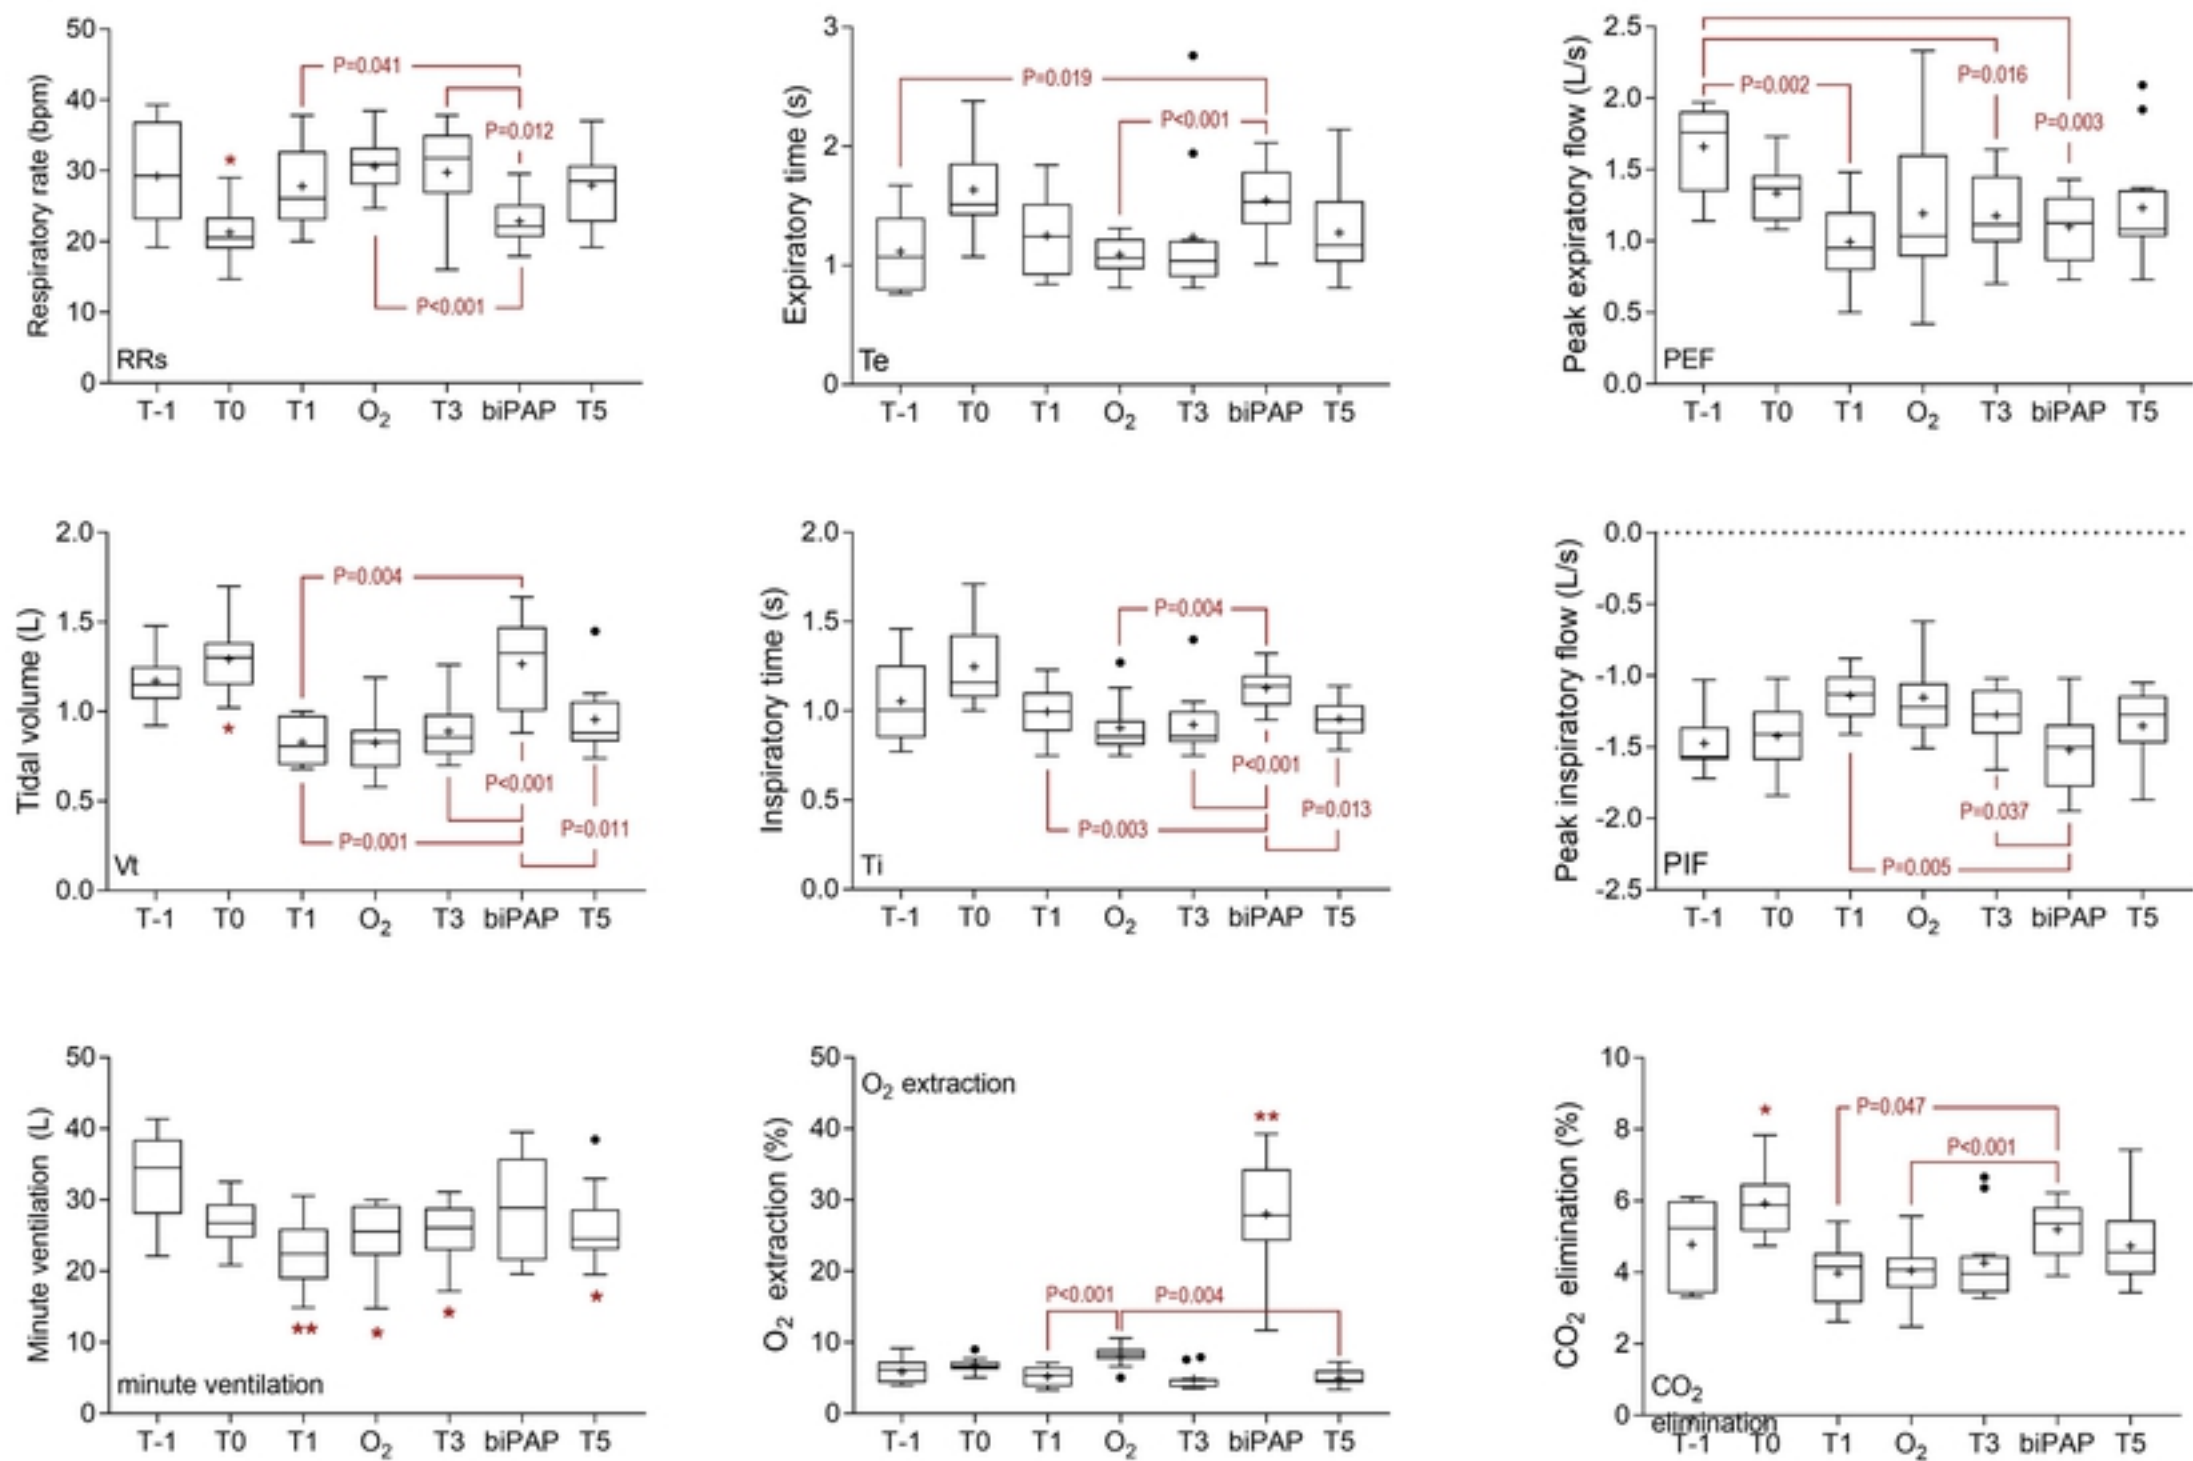

Fig 2.tif

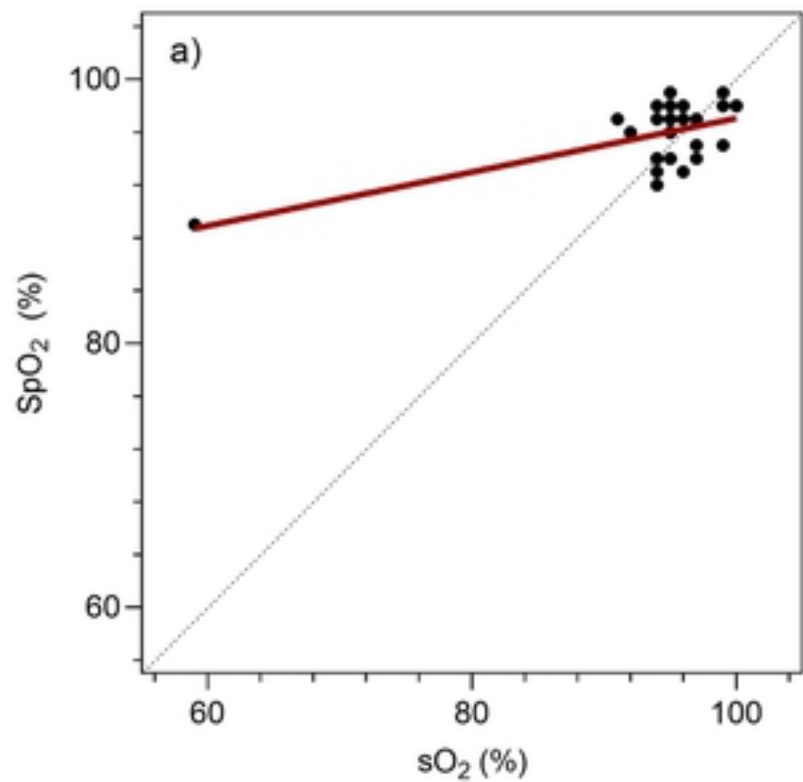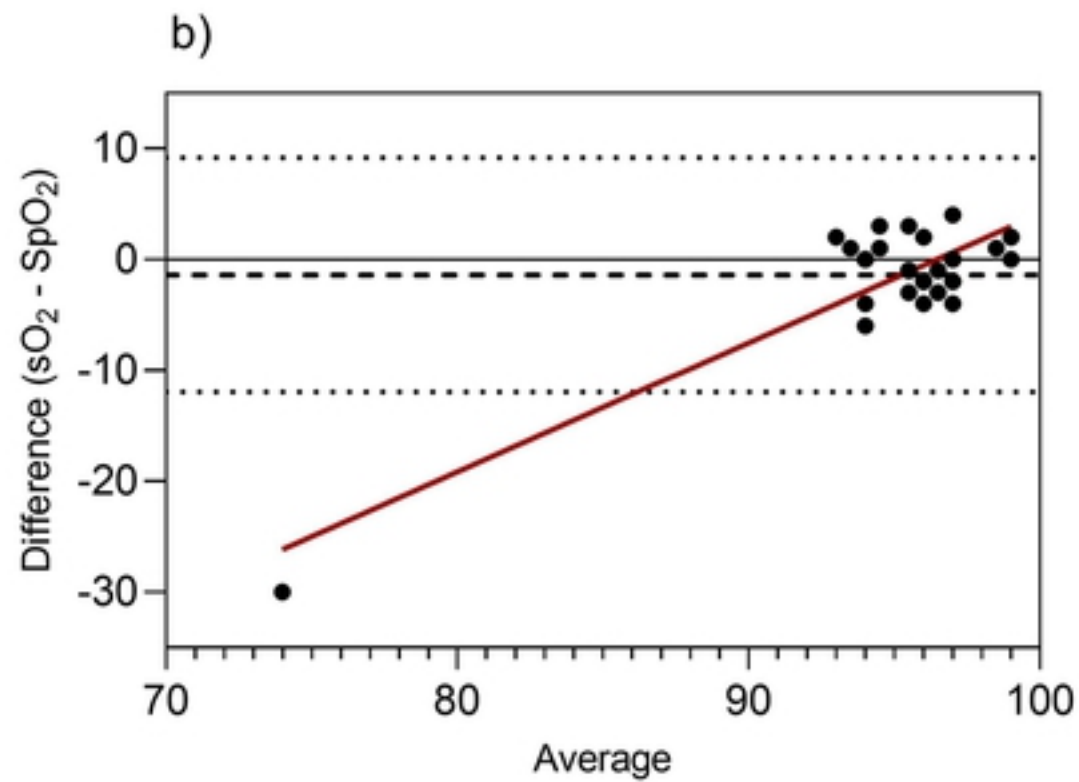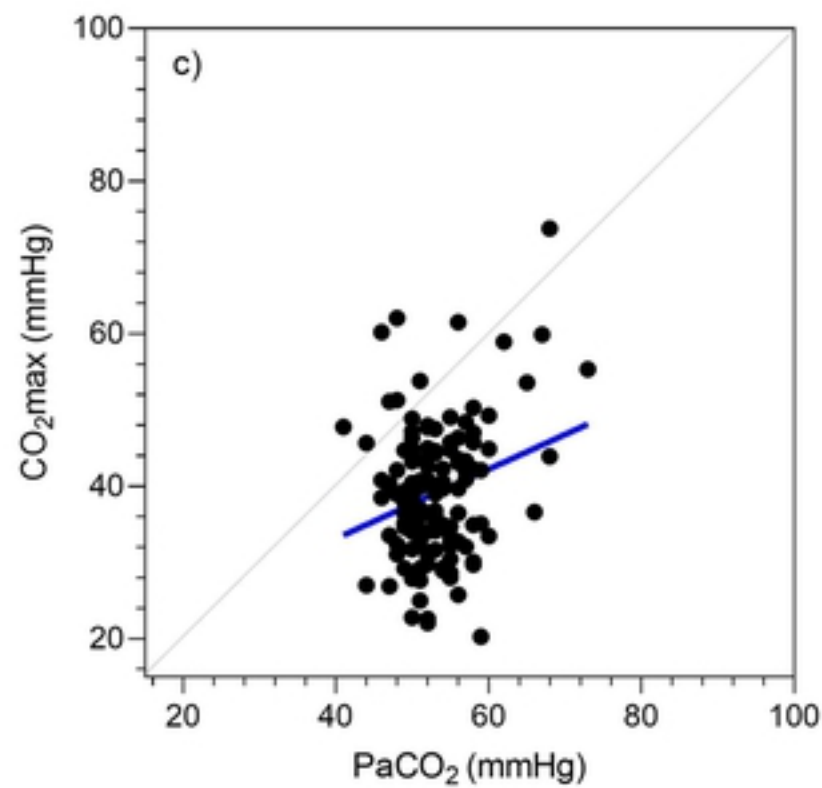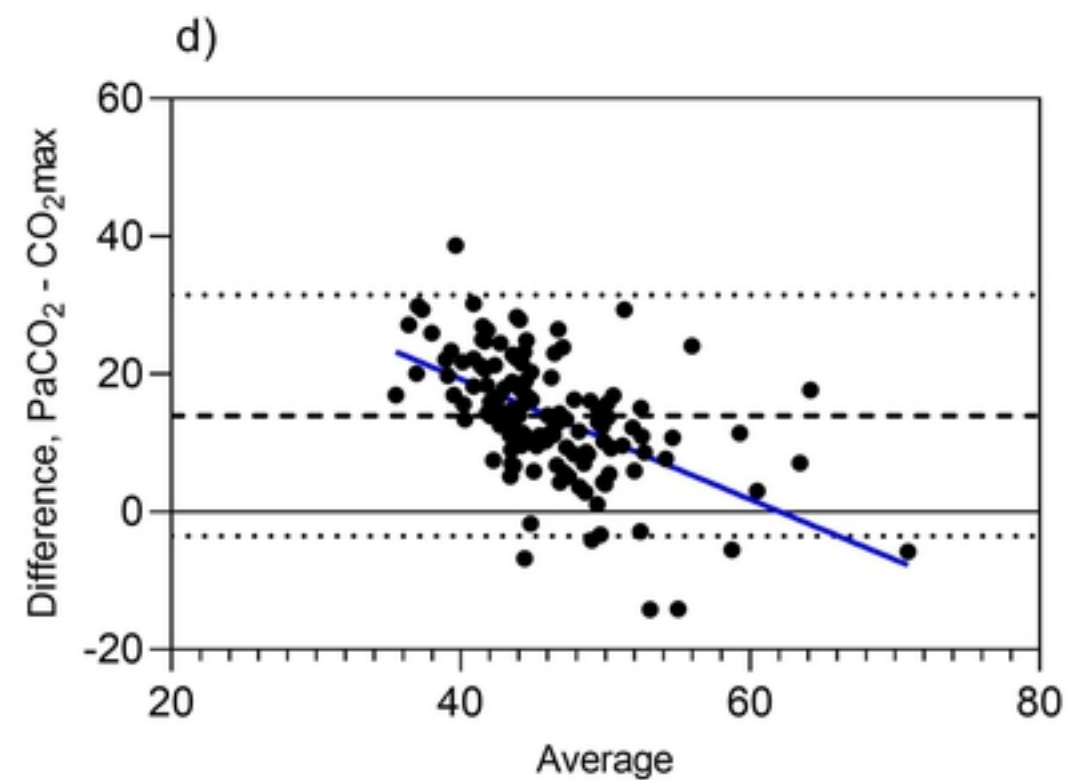

Fig 3.tif



Fig 1.tif



Fig 2.tif



Fig 3.tif
